# Supplementary material
Source: PubMed Central journal article supplement (PMC5296276)
Supplement: NIHMS825343-supplement-4.pdf [file NIHMS825343-supplement-4.pdf]

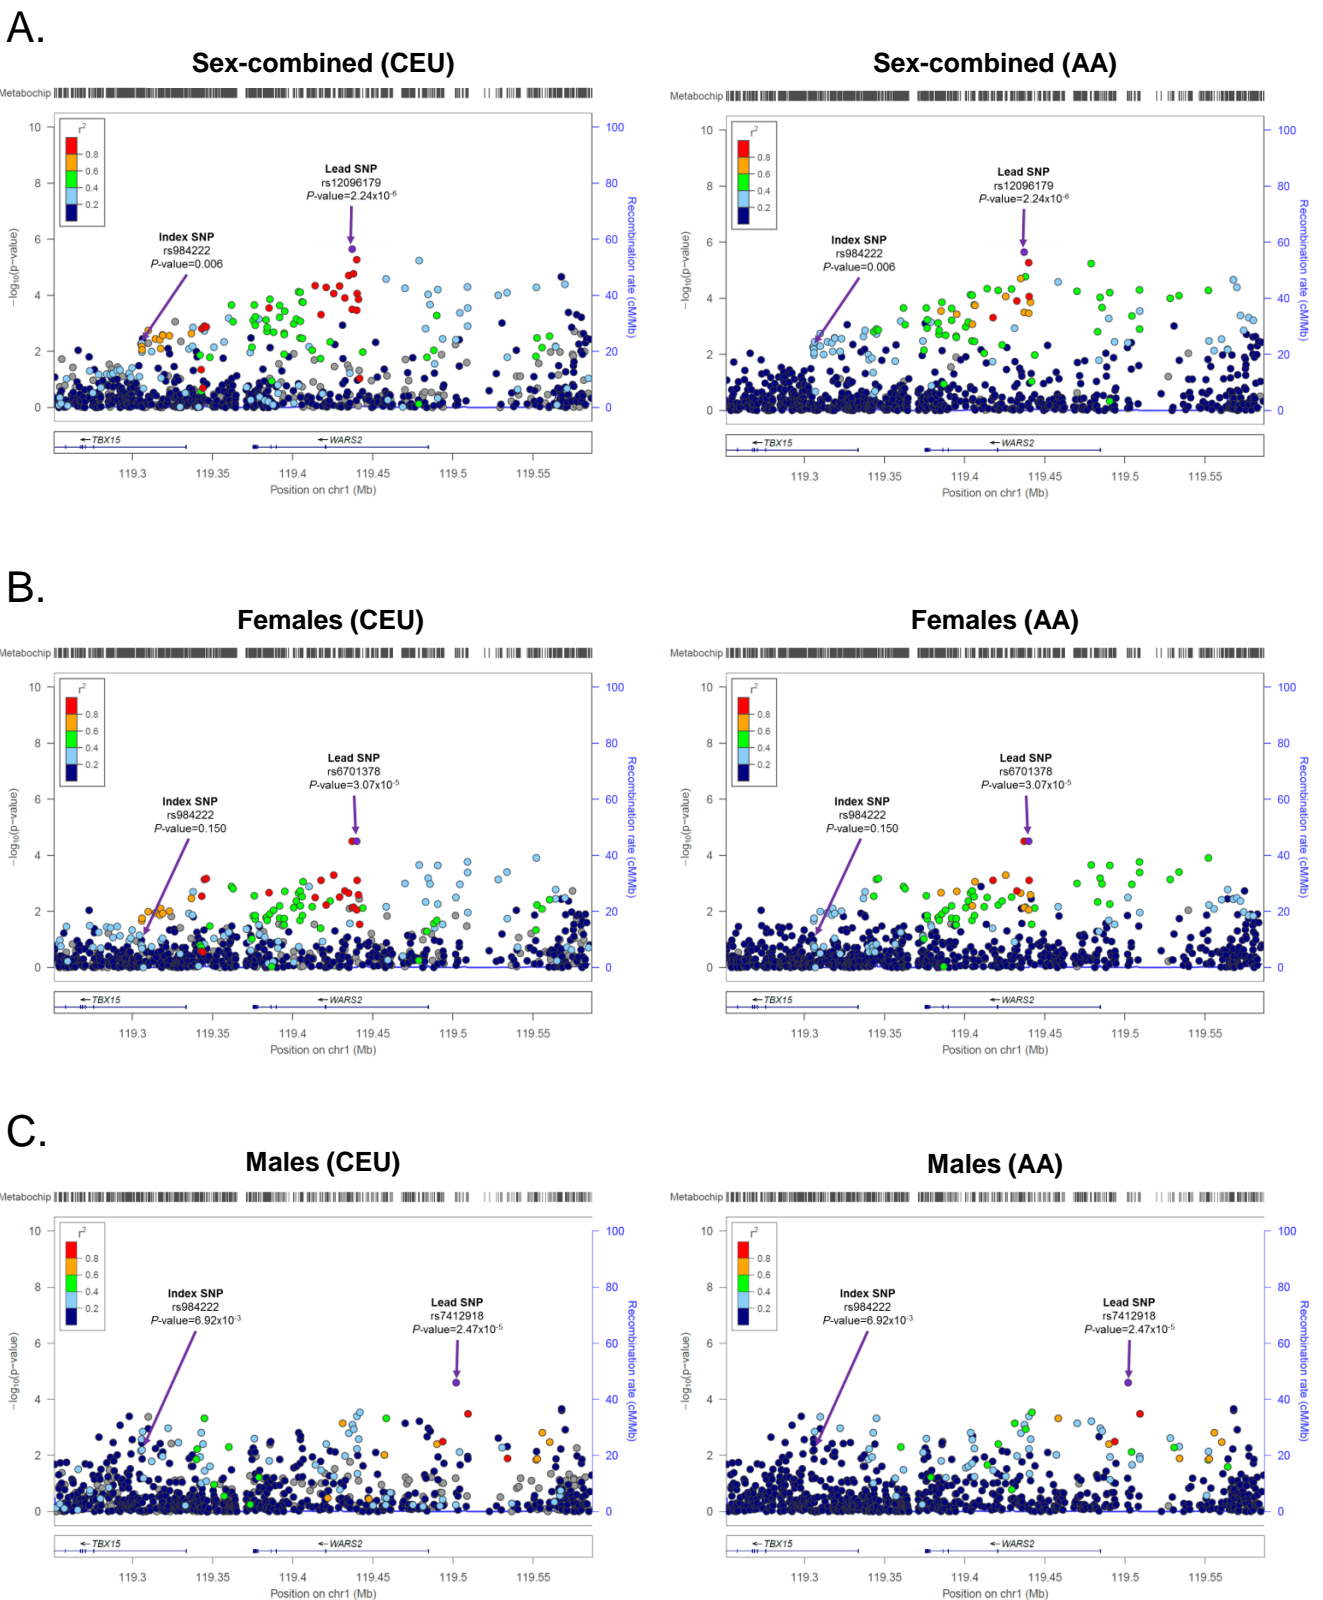

**Supplementary Figure 4.** Locus Zoom Plots of locus around the *TBX15* and *WARS2* genes using LD patterns calculated from a Swedish Population (CEU), and African American participants from the ARIC study (AA). Results from the **(A)** sex-combined, **(B)** female-only, **(C)** male-only meta-analyses.

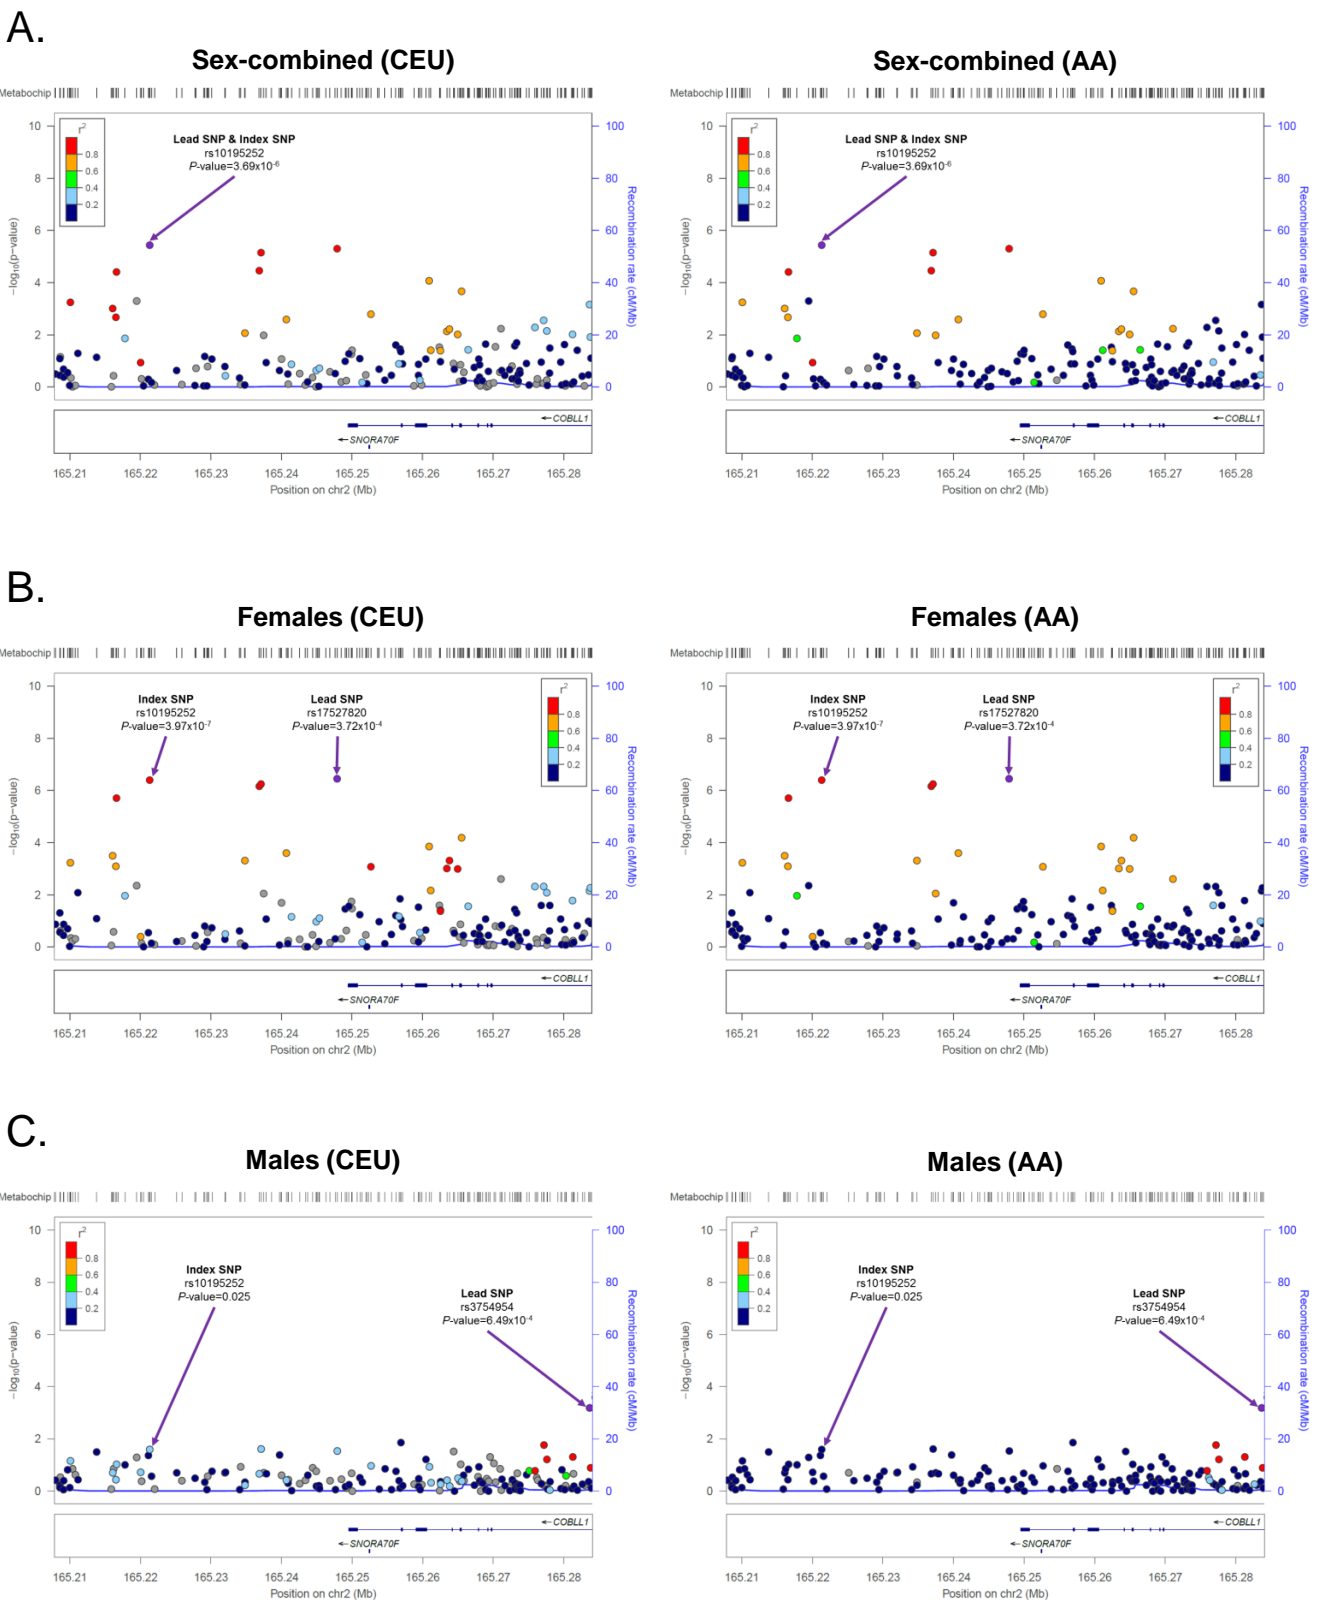

**Supplementary Figure 5.** Locus Zoom Plots of the *GRB14* locus around the *COBLL1* and *SNORA70F* genes using LD patterns calculated from a Swedish Population (CEU), and African American participants from the ARIC study (AA). Results from the **(A)** sex-combined, **(B)** female-only, **(C)** male-only meta-analyses.

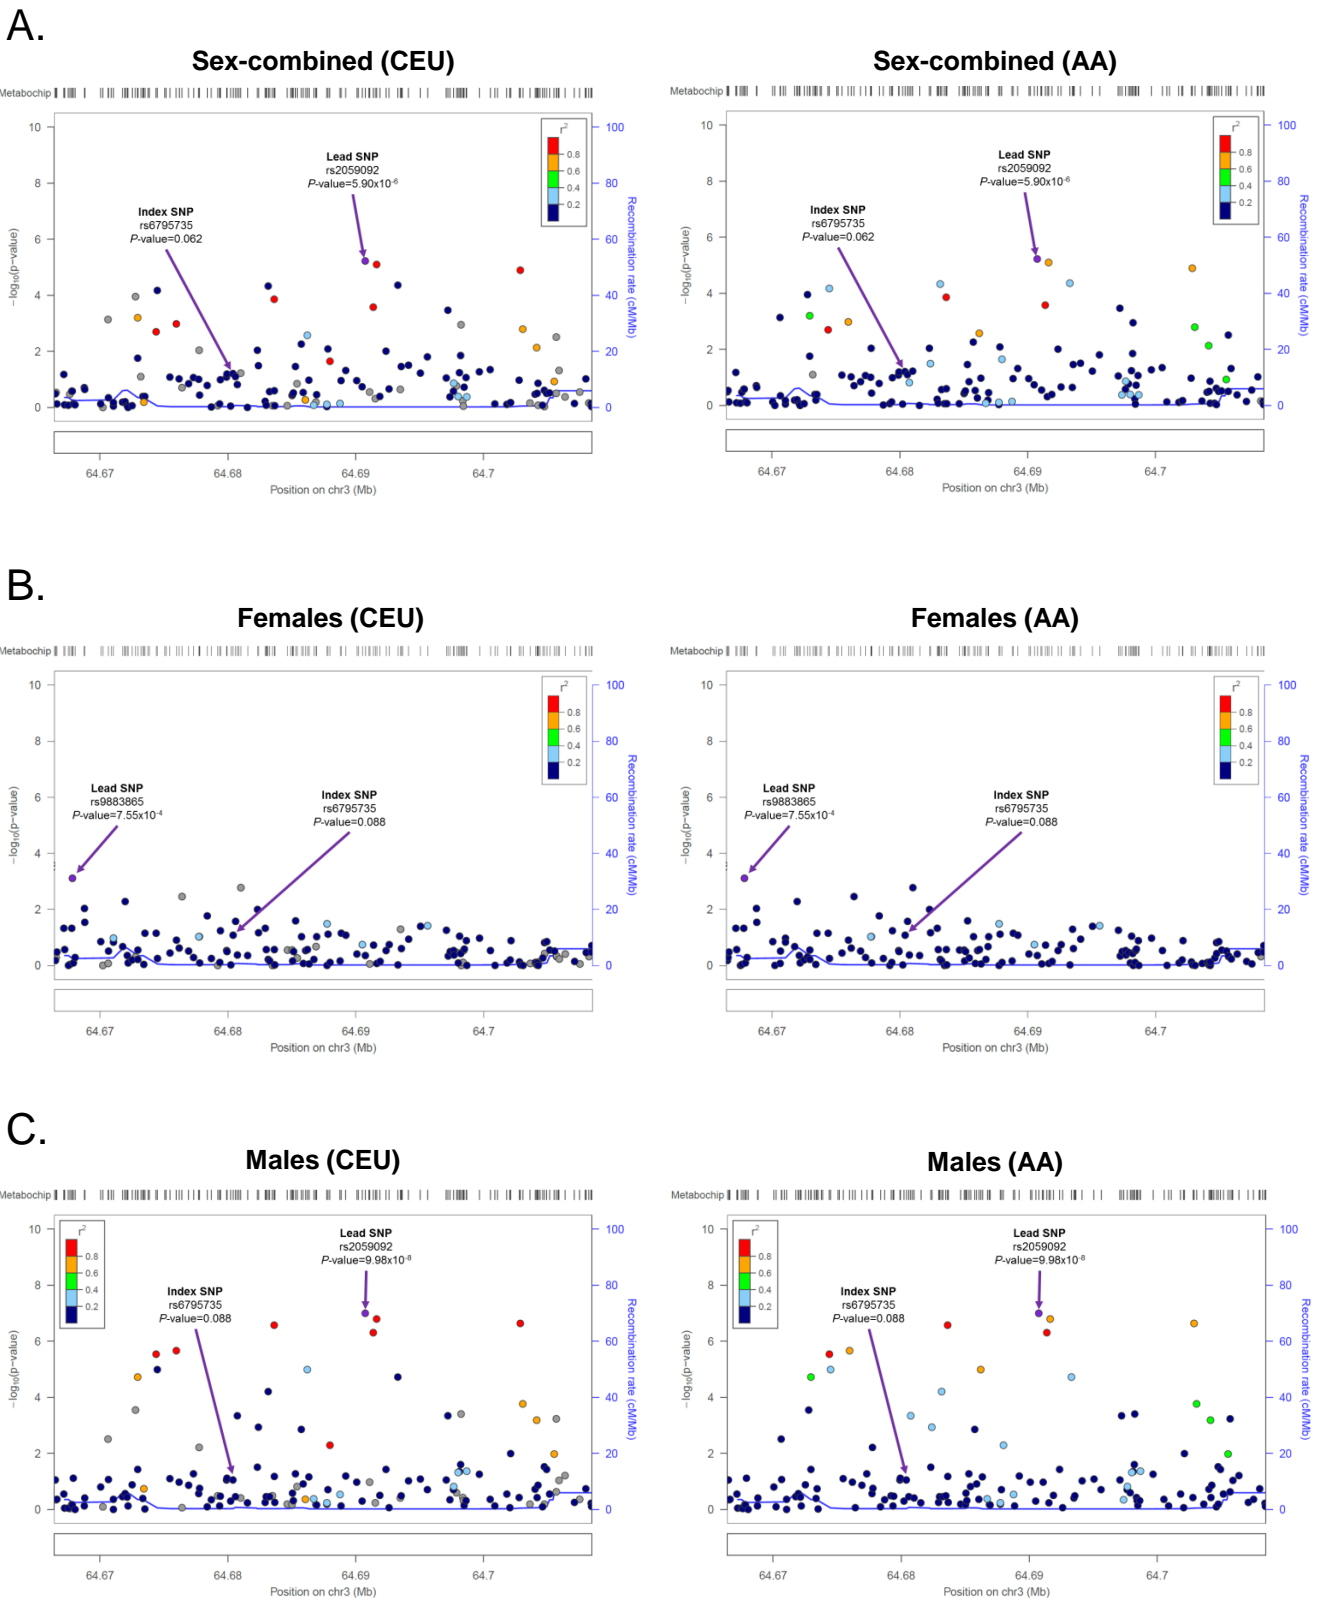

**Supplementary Figure 6.** Locus Zoom Plots of locus around the *ADAMTS9-AS2* gene and *MIR548A2* miRNA using LD patterns calculated from a Swedish Population (CEU), and African American participants from the ARIC study (AA). Results from the **(A)** sex-combined, **(B)** female-only, **(C)** male-only meta-analyses.

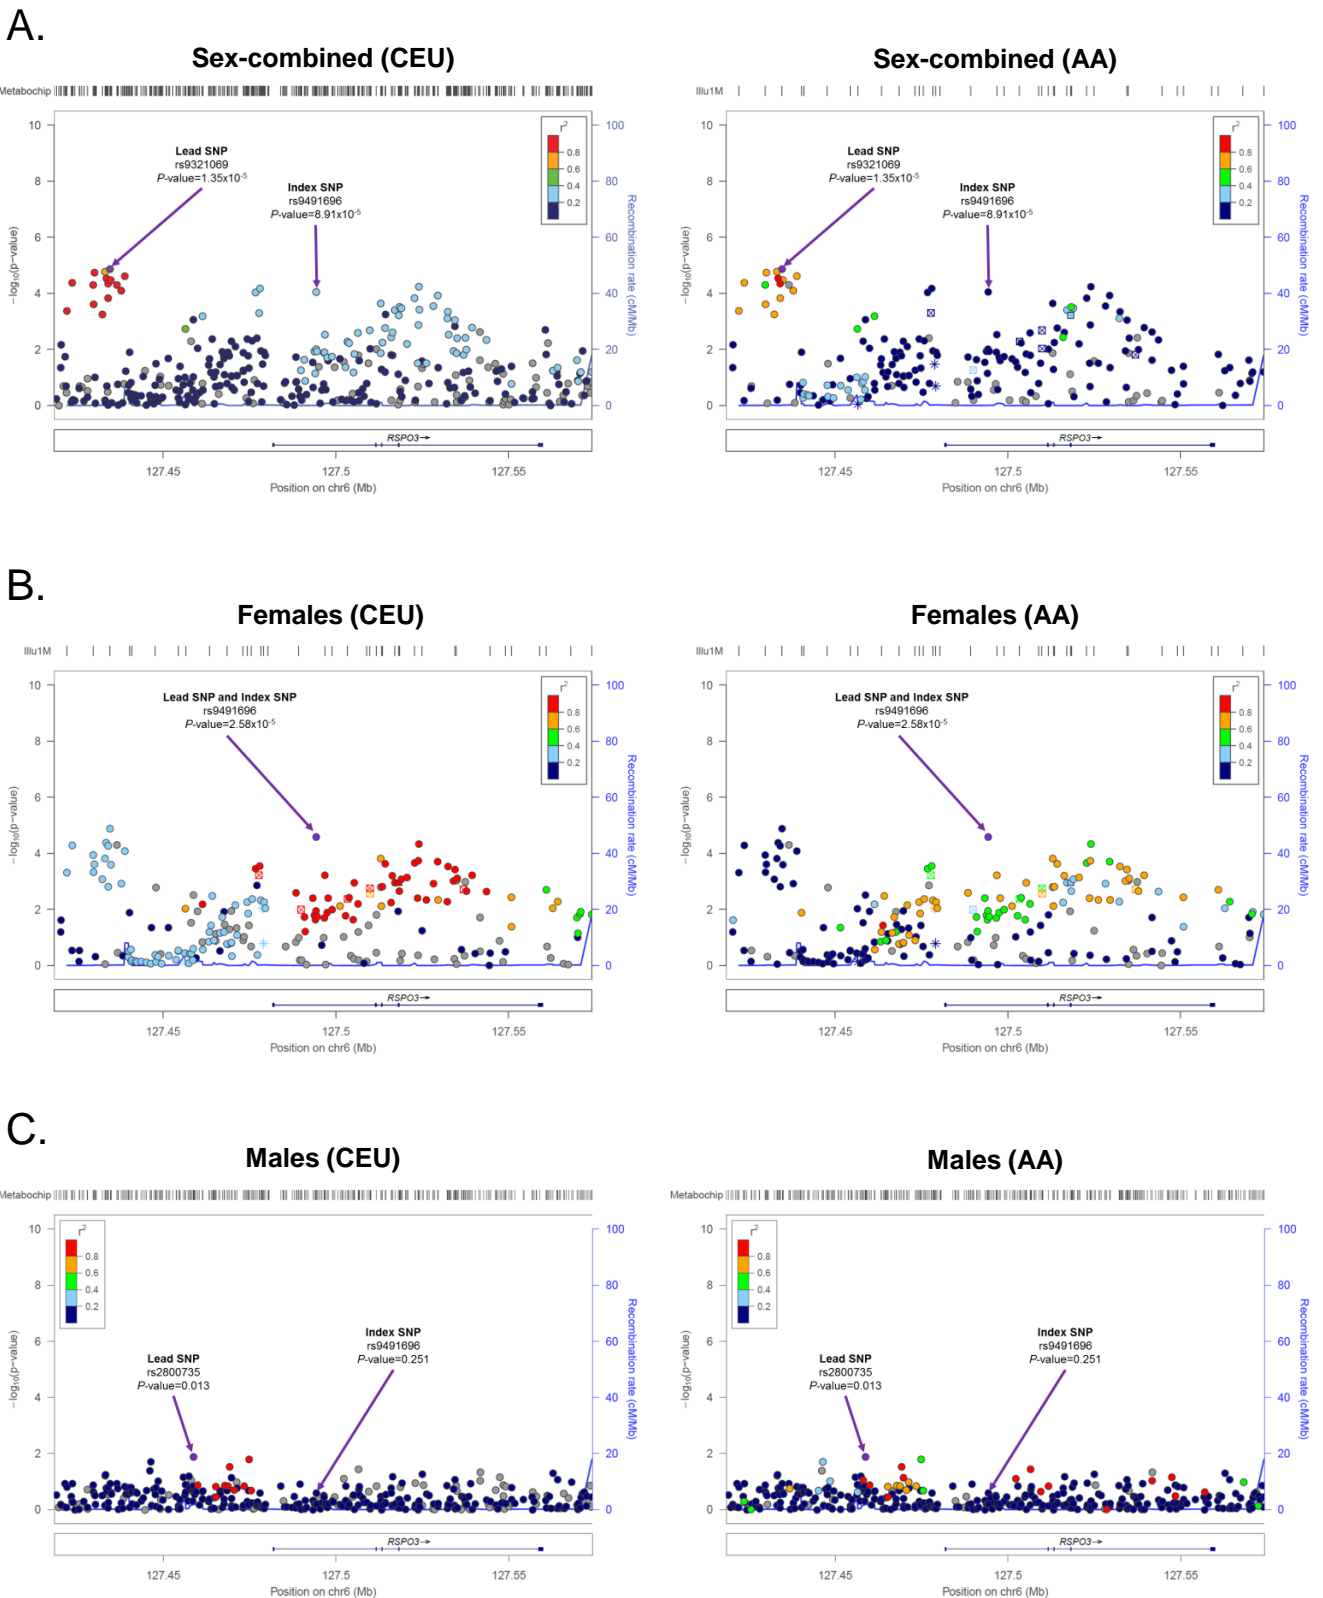

**Supplementary Figure 7.** Locus Zoom Plots of the locus around the *RSPO3* gene using LD patterns calculated from a Swedish Population (CEU), and African American participants from the ARIC study (AA). Results from the **(A)** sex-combined, **(B)** female-only, **(C)** male-only meta-analyses.
