# Supplementary material
Source: PubMed Central journal article supplement (PMC5296276)
Supplement: NIHMS825343-supplement-5.pdf [file NIHMS825343-supplement-5.pdf]

## TBX15-WARS2 locus

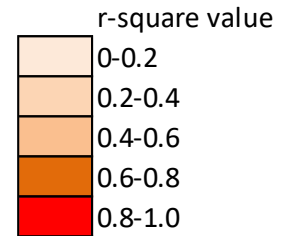

|                                 |            | Sex-combined | Female      | Male        | Index & Trans-ethnic | AA discovery |
|---------------------------------|------------|--------------|-------------|-------------|----------------------|--------------|
|                                 |            | rs12096179   | rs6701378   | rs7412918   | rs984222             | rs10923714   |
| <b>Sex-combined</b>             | rs12096179 |              | 1.00 (1.00) | 0.27 (1.00) | 0.33 (0.92)          | 0.67 (0.91)  |
| <b>Female</b>                   | rs6701378  | 1.00 (1.00)  |             | 0.27 (1.00) | 0.33 (0.92)          | 0.67 (0.91)  |
| <b>Male</b>                     | rs7412918  | 0.27 (1.00)  | 0.27 (1.00) |             | 0.24 (0.58)          | 0.15 (0.66)  |
| <b>Index &amp; Trans-ethnic</b> | rs984222   | 0.33 (0.92)  | 0.33 (0.92) | 0.24 (0.58) |                      | 0.48 (1.00)  |
| <b>AA discovery</b>             | rs10923714 | 0.67 (0.91)  | 0.67 (0.91) | 0.15 (0.66) | 0.48 (1.00)          |              |

r<sup>2</sup> (D') using 1000G CEU as reference sample

|                                 |            | Sex-combined | Female      | Male        | Index & Trans-ethnic | AA discovery |
|---------------------------------|------------|--------------|-------------|-------------|----------------------|--------------|
|                                 |            | rs12096179   | rs6701378   | rs7412918   | rs984222             | rs10923714   |
| <b>Sex-combined</b>             | rs12096179 |              | 1.00 (1.00) | 0.21 (0.88) | 0.37 (0.77)          | 0.23 (0.89)  |
| <b>Female</b>                   | rs6701378  | 1.00 (1.00)  |             | 0.21 (0.88) | 0.37 (0.77)          | 0.23 (0.89)  |
| <b>Male</b>                     | rs7412918  | 0.21 (0.88)  | 0.21 (0.88) |             | 0.10 (0.85)          | 0.08 (1.00)  |
| <b>Index &amp; Trans-ethnic</b> | rs984222   | 0.37 (0.77)  | 0.37 (0.77) | 0.10 (0.85) |                      | 0.49 (1.00)  |
| <b>AA discovery</b>             | rs10923714 | 0.23 (0.89)  | 0.23 (0.89) | 0.08 (1.00) | 0.49 (1.00)          |              |

r<sup>2</sup> (D') using 1000G YRI or ARIC AA as reference sample

**Supplementary Figure 8a.** LD heat plot of lead SNPs identified from the sex-combined, female-only, male-only meta-analyses in the current study in addition to all previous SNPs identified also from the *TBX15-WARS2* locus from other studies. Top plot shows r<sup>2</sup>(D') between each SNP pair using the 1000G CEU reference population, and the bottom plot shows r<sup>2</sup>(D') between each SNP pair using 1000G YRI as reference.

# GRB14 locus

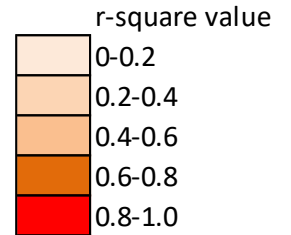

|                                    |            | <b>Sex-combined &amp; Index</b> | <b>Female &amp; Dimorphism</b> | <b>AA discovery &amp; Extremes</b> | <b>Trans-ethnic</b> |
|------------------------------------|------------|---------------------------------|--------------------------------|------------------------------------|---------------------|
|                                    |            | rs10195252                      | rs6717858                      | rs13389219                         | rs1128249           |
| <b>Sex-combined &amp; Index</b>    | rs10195252 |                                 |                                |                                    |                     |
| <b>Female &amp; Dimorphism</b>     | rs6717858  | 0.87 (0.93)                     |                                |                                    |                     |
| <b>AA discovery &amp; Extremes</b> | rs13389219 | 0.93 (1.00)                     | 0.93 (1.00)                    |                                    |                     |
| <b>Trans-ethnic</b>                | rs1128249  | 0.93 (1.00)                     | 0.93 (1.00)                    | 1.00 (1.00)                        |                     |

r<sup>2</sup> (D') using 1000G CEU as reference sample

|                                    |            | <b>Sex-combined &amp; Index</b> | <b>Female &amp; Dimorphism</b> | <b>AA discovery &amp; Extremes</b> | <b>Trans-ethnic</b> |
|------------------------------------|------------|---------------------------------|--------------------------------|------------------------------------|---------------------|
|                                    |            | rs10195252                      | rs6717858                      | rs13389219                         | rs1128249           |
| <b>Sex-combined &amp; Index</b>    | rs10195252 |                                 |                                |                                    |                     |
| <b>Female &amp; Dimorphism</b>     | rs6717858  | 1.00 (1.00)                     |                                |                                    |                     |
| <b>AA discovery &amp; Extremes</b> | rs13389219 | 1.00 (1.00)                     | 1.00 (1.00)                    |                                    |                     |
| <b>Trans-ethnic</b>                | rs1128249  | 1.00 (1.00)                     | 1.00 (1.00)                    | 1.00 (1.00)                        |                     |

r<sup>2</sup> (D') using 1000G YRI or ARIC AA as reference sample

**Supplementary Figure 8b.** LD heat plot of lead SNPs identified from the sex-combined, female-only, male-only meta-analyses in the current study in addition to all previous SNPs identified also from the *GRB14* locus from other studies. Top plot shows r<sup>2</sup>(D') between each SNP pair using the 1000G CEU reference population, and the bottom plot shows r<sup>2</sup>(D') between each SNP pair using 1000G YRI as reference.

# ADAMTS9 locus



|                       |            | Sex-combined & Female | Index       | AA discovery | Trans-ethnic |
|-----------------------|------------|-----------------------|-------------|--------------|--------------|
|                       |            | rs2059092             | rs6795735   | rs13060013   | rs4132228    |
| Sex-combined & Female | rs2059092  |                       | 0.06 (1.00) | 0.01 (1.00)  | 0.06 (1.00)  |
| Index                 | rs6795735  | 0.06 (1.00)           |             | 0.33 (1.00)  | 0.39 (1.00)  |
| AA discovery          | rs13060013 | 0.01 (1.00)           | 0.33 (1.00) |              | 0.01 (0.23)  |
| Trans-ethnic          | rs4132228  | 0.06 (1.00)           | 0.39 (1.00) | 0.01 (0.23)  |              |

r2 (D') using 1000G CEU as reference sample

|                       |            | Sex-combined & Female | Index       | AA discovery | Trans-ethnic |
|-----------------------|------------|-----------------------|-------------|--------------|--------------|
|                       |            | rs2059092             | rs6795735   | rs13060013   | rs4132228    |
| Sex-combined & Female | rs2059092  |                       | 0.09 (1.00) | 0.28 (1.00)  | 0.26 (0.90)  |
| Index                 | rs6795735  | 0.09 (1.00)           |             | 0.01 (0.45)  | 0.11 (1.00)  |
| AA discovery          | rs13060013 | 0.28 (1.00)           | 0.01 (0.45) |              | 0.68 (0.87)  |
| Trans-ethnic          | rs4132228  | 0.26 (0.90)           | 0.11 (1.00) | 0.68 (0.87)  |              |

r2 (D') using 1000G YRI or ARIC AA as reference sample

**Supplementary Figure 8c.** LD heat plot of lead SNPs identified from the sex-combined, female-only, male-only meta-analyses in the current study in addition to all previous SNPs identified also from the *ADAMTS9* locus from other studies. Top plot shows  $r^2(D')$  between each SNP pair using the 1000G CEU reference population, and the bottom plot shows  $r^2(D')$  between each SNP pair using 1000G YRI as reference.

# RSPO3 locus

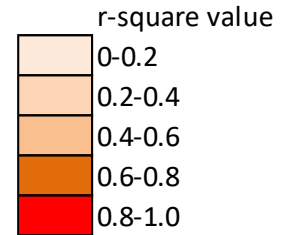

|                           |           | Sex-combined | Female & Index | AA discovery | Trans-ethnic | Dimorphism  | Extremes  |
|---------------------------|-----------|--------------|----------------|--------------|--------------|-------------|-----------|
|                           |           | rs9321069    | rs9491696      | rs1936806    | rs7766106    | rs1936805   | rs7745274 |
| <b>Sex-combined</b>       | rs9321069 |              |                |              |              |             |           |
| <b>Female &amp; Index</b> | rs9491696 | 0.37 (0.74)  |                |              |              |             |           |
| <b>AA discovery</b>       | rs1936806 | 0.30 (0.71)  | 0.88 (1.00)    |              |              |             |           |
| <b>Trans-ethnic</b>       | rs7766106 | 0.39 (0.75)  | 0.97 (1.00)    | 0.85 (1.00)  |              |             |           |
| <b>Dimorphism</b>         | rs1936805 | 0.39 (0.75)  | 0.97 (1.00)    | 0.85 (1.00)  | 1.00 (1.00)  |             |           |
| <b>Extremes</b>           | rs7745274 | 0.41 (0.70)  | 0.79 (1.00)    | 0.69 (1.00)  | 0.82 (1.00)  | 0.82 (1.00) |           |

r<sup>2</sup> (D') using 1000G CEU as reference sample

|                           |           | Sex-combined | Female & Index | AA discovery | Trans-ethnic | Dimorphism  | Extremes  |
|---------------------------|-----------|--------------|----------------|--------------|--------------|-------------|-----------|
|                           |           | rs9321069    | rs9491696      | rs1936806    | rs7766106    | rs1936805   | rs7745274 |
| <b>Sex-combined</b>       | rs9321069 |              |                |              |              |             |           |
| <b>Female &amp; Index</b> | rs9491696 | 0.07 (0.43)  |                |              |              |             |           |
| <b>AA discovery</b>       | rs1936806 | 0.08 (0.62)  | 0.52 (1.00)    |              |              |             |           |
| <b>Trans-ethnic</b>       | rs7766106 | 0.08 (0.48)  | 0.77 (0.92)    | 0.58 (1.00)  |              |             |           |
| <b>Dimorphism</b>         | rs1936805 | 0.18 (0.43)  | 0.42 (1.00)    | 0.22 (1.00)  | 0.58 (1.00)  |             |           |
| <b>Extremes</b>           | rs7745274 | 0.14 (0.39)  | 0.32 (0.86)    | 0.22 (1.00)  | 0.33 (0.93)  | 0.66 (0.81) |           |

r<sup>2</sup> (D') using 1000G YRI or ARIC AA as reference sample

**Supplementary Figure 8d.** LD heat plot of lead SNPs identified from the sex-combined, female-only, male-only meta-analyses in the current study in addition to all previous SNPs identified also from the *RSPO3* locus from other studies. Top plot shows r<sup>2</sup>(D') between each SNP pair using the 1000G CEU reference population, and the bottom plot shows r<sup>2</sup>(D') between each SNP pair using 1000G YRI as reference.

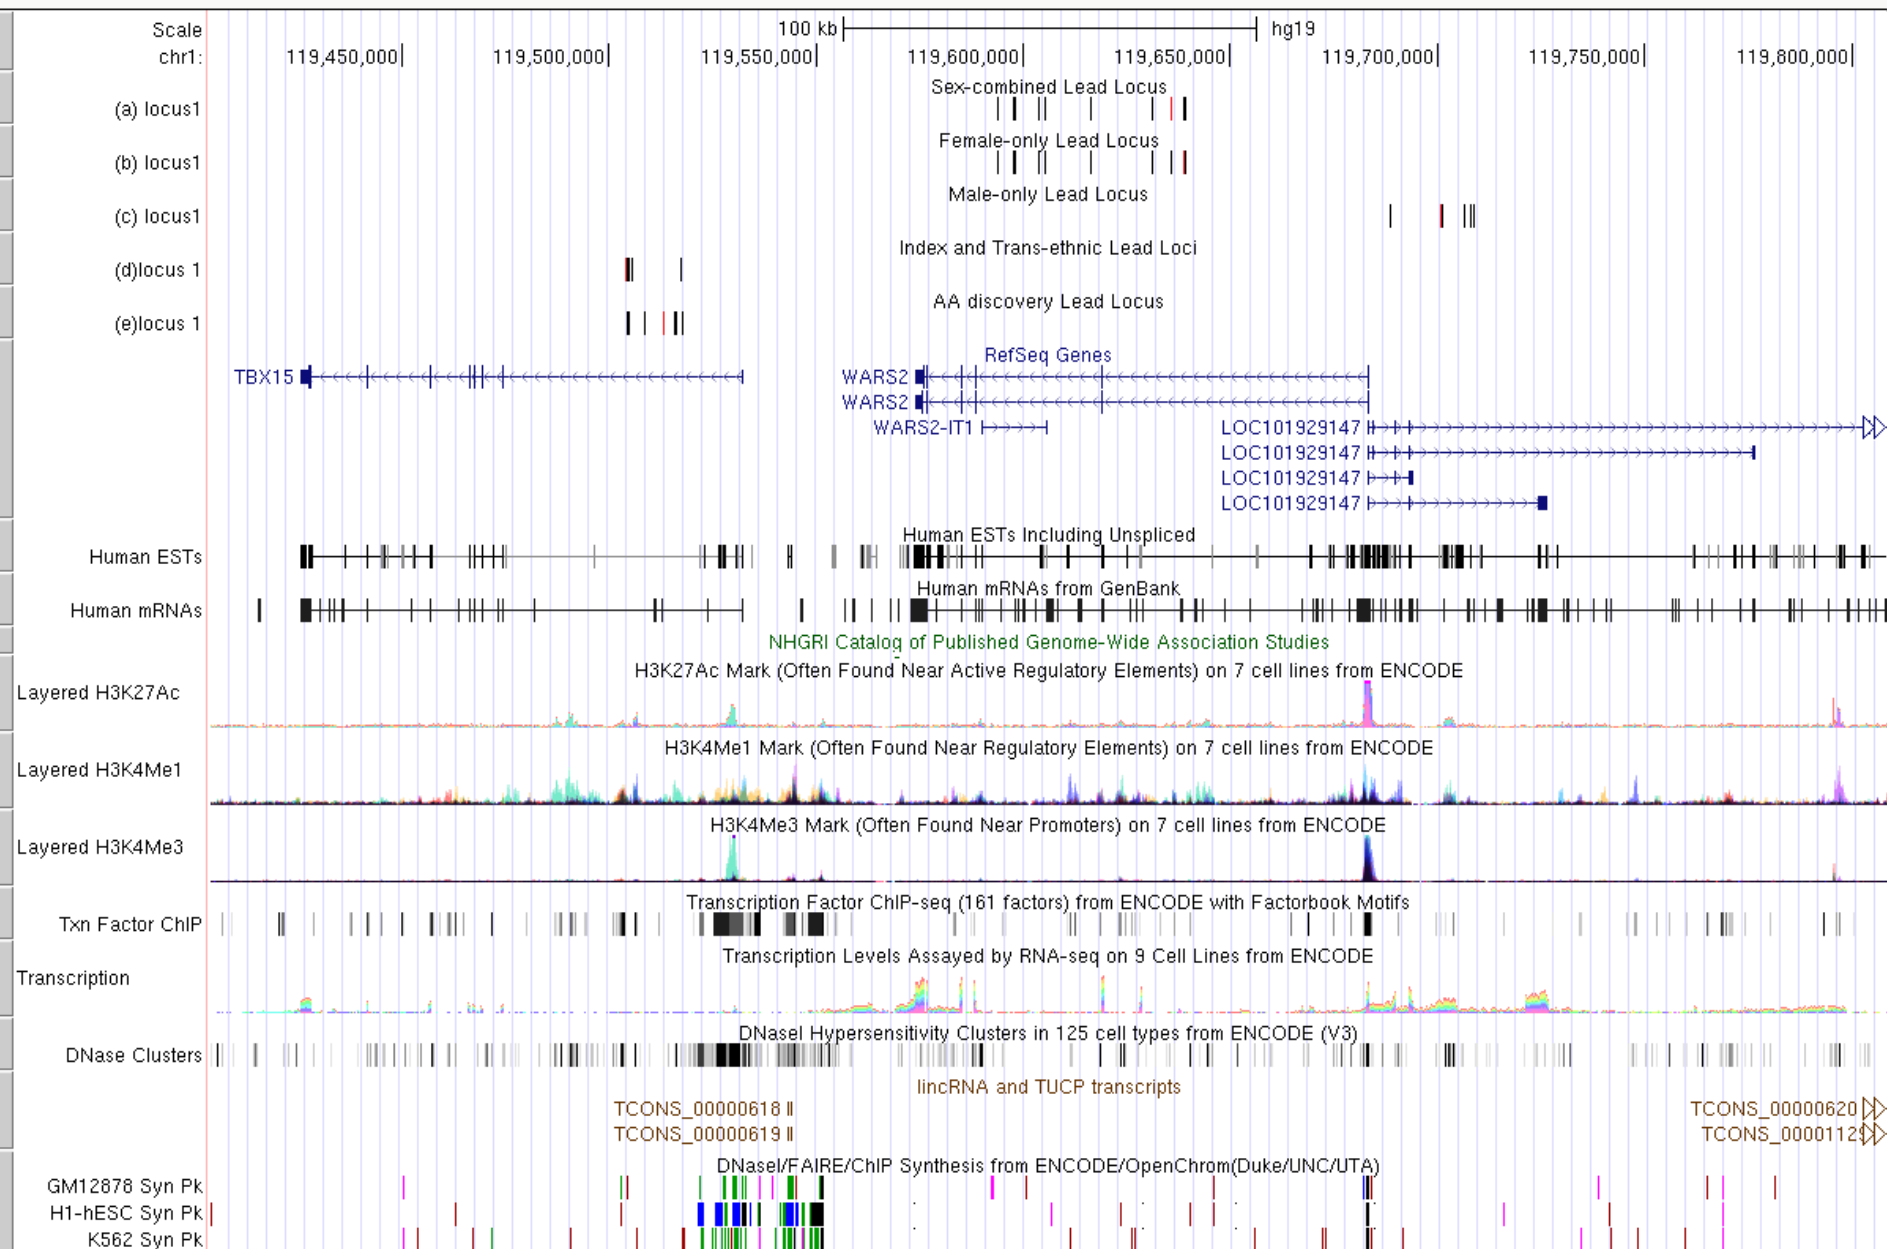

**Supplementary Figure 9.** Visualization of the *TBX15*-*WARS2* locus using the UCSC genome browser. Top tracks show lead SNPs from current and previous studies. The lead SNP is shown in a red vertical bar. All SNPs in  $r^2$  of 0.8 or higher with the lead SNP using 1000G YRI is shown in black vertical bars.

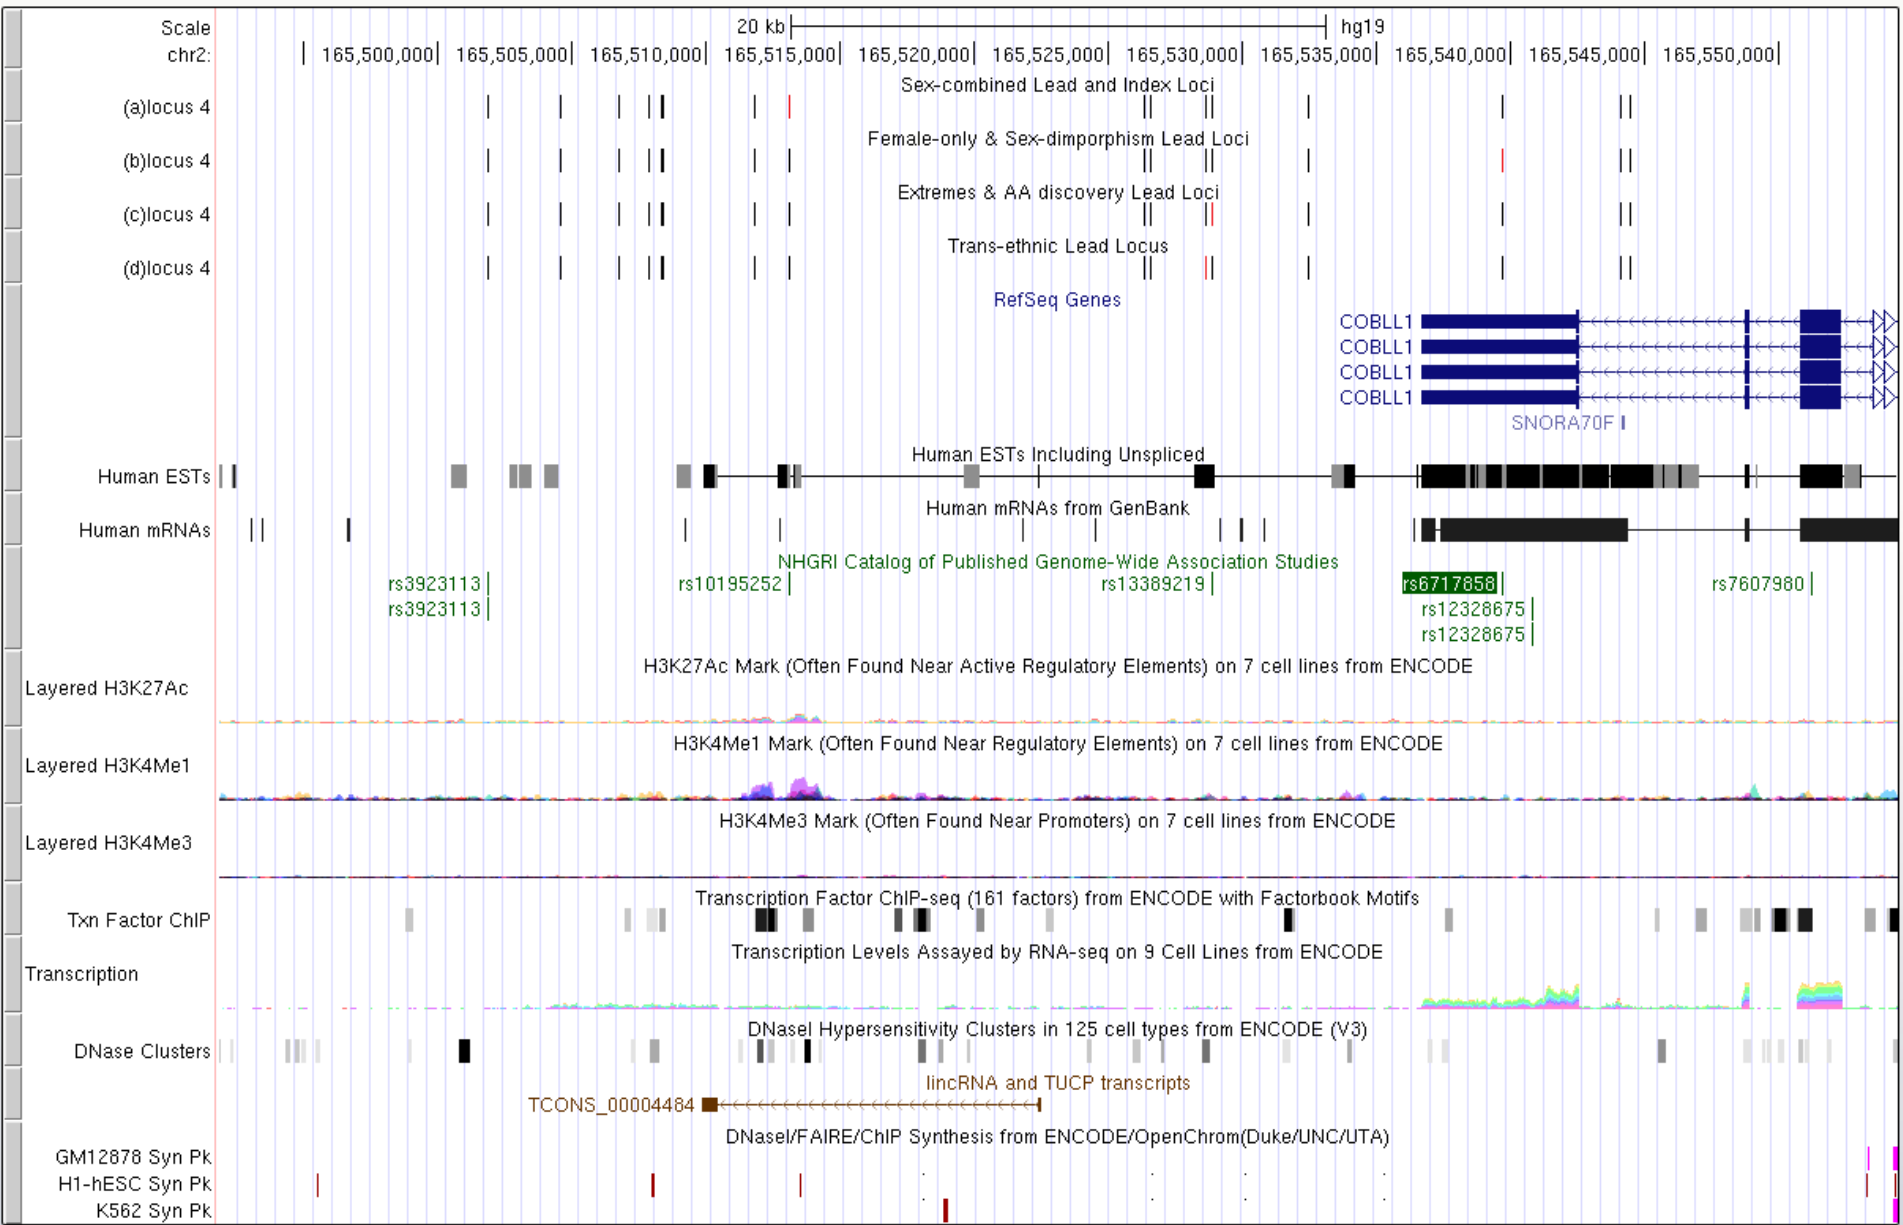

**Supplementary Figure 10.** Visualization of the *GRB14* locus using the UCSC genome browser. Top tracks show lead SNPs from current and previous studies. The lead SNP is shown in a red vertical bar. All SNPs in  $r^2$  of 0.8 or higher with the lead SNP using 1000G YRI is shown in black vertical bars.

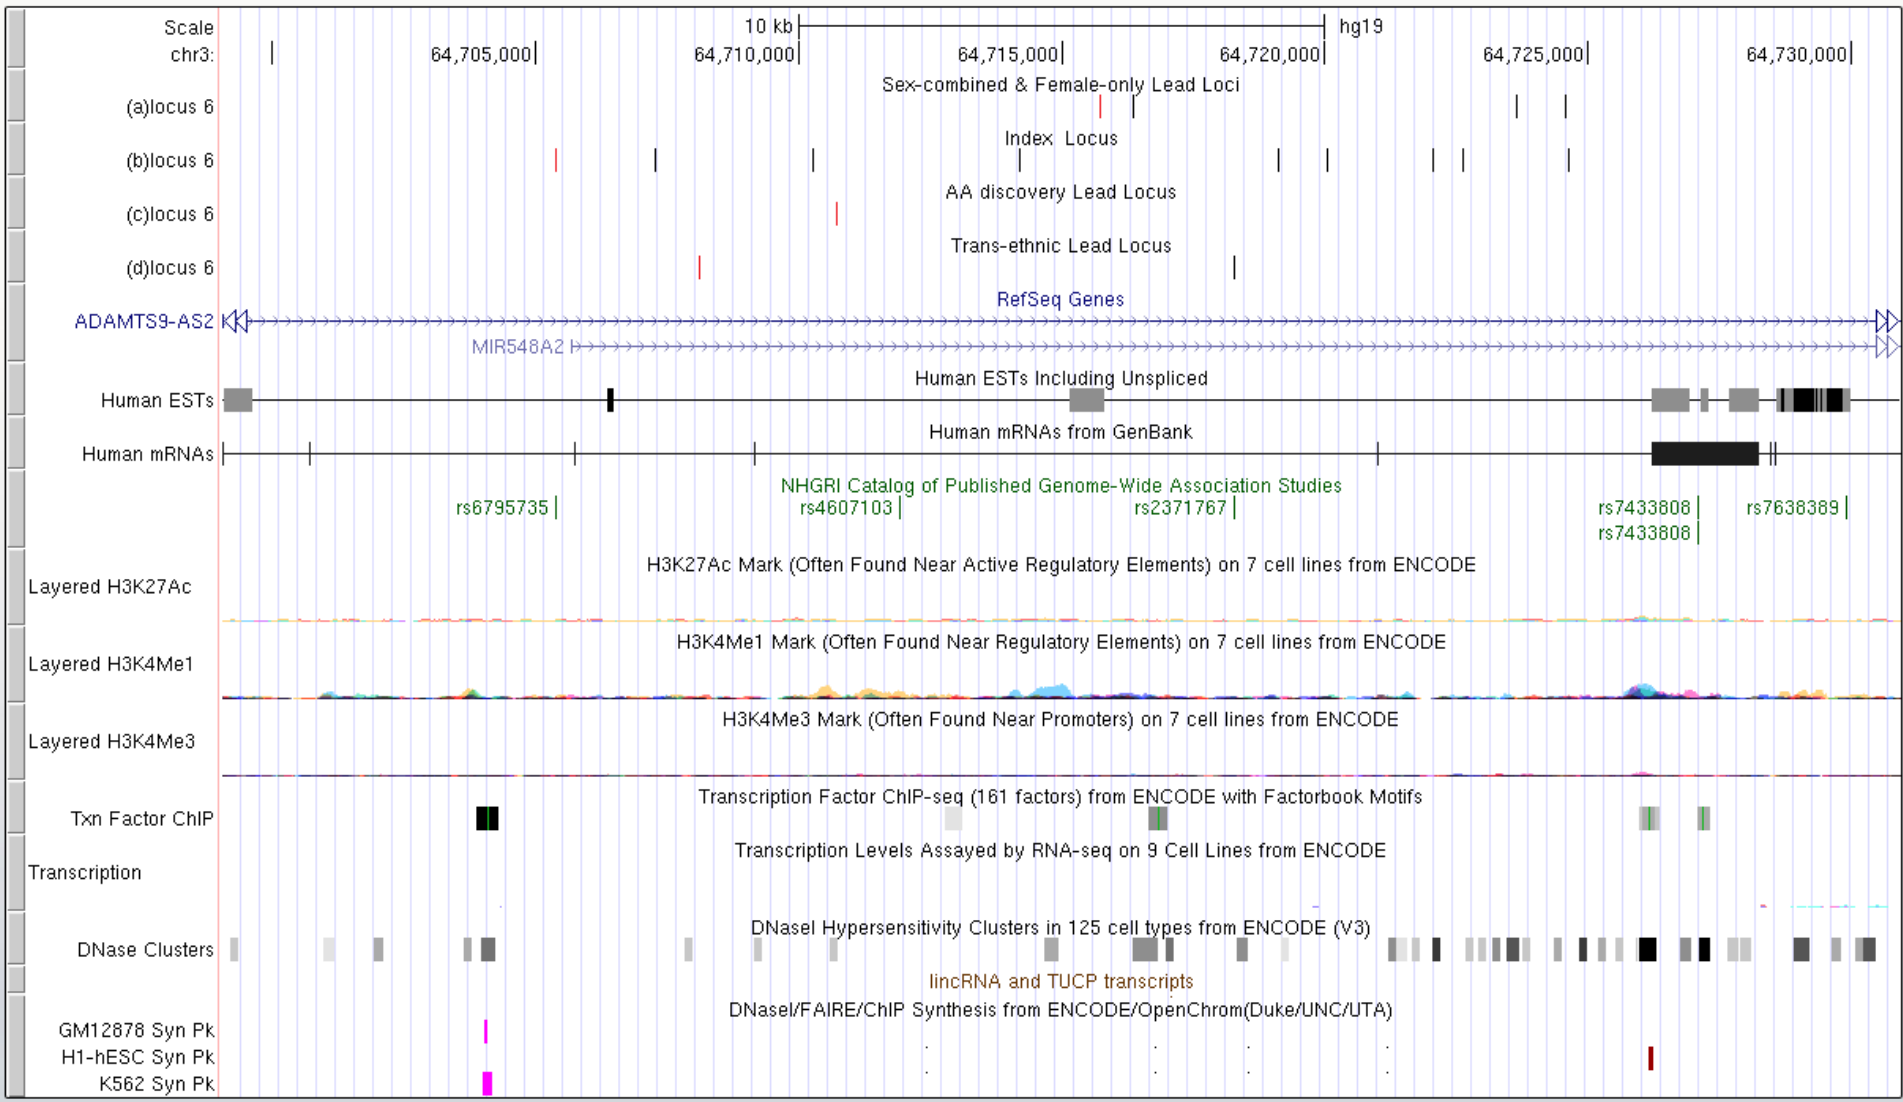

**Supplementary Figure 11.** Visualization of the *ADAMTS9* locus using the UCSC genome browser. Top tracks show lead SNPs from current and previous studies. The lead SNP is shown in a red vertical bar. All SNPs in  $r^2$  of 0.8 or higher with the lead SNP using 1000G YRI is shown in black vertical bars.

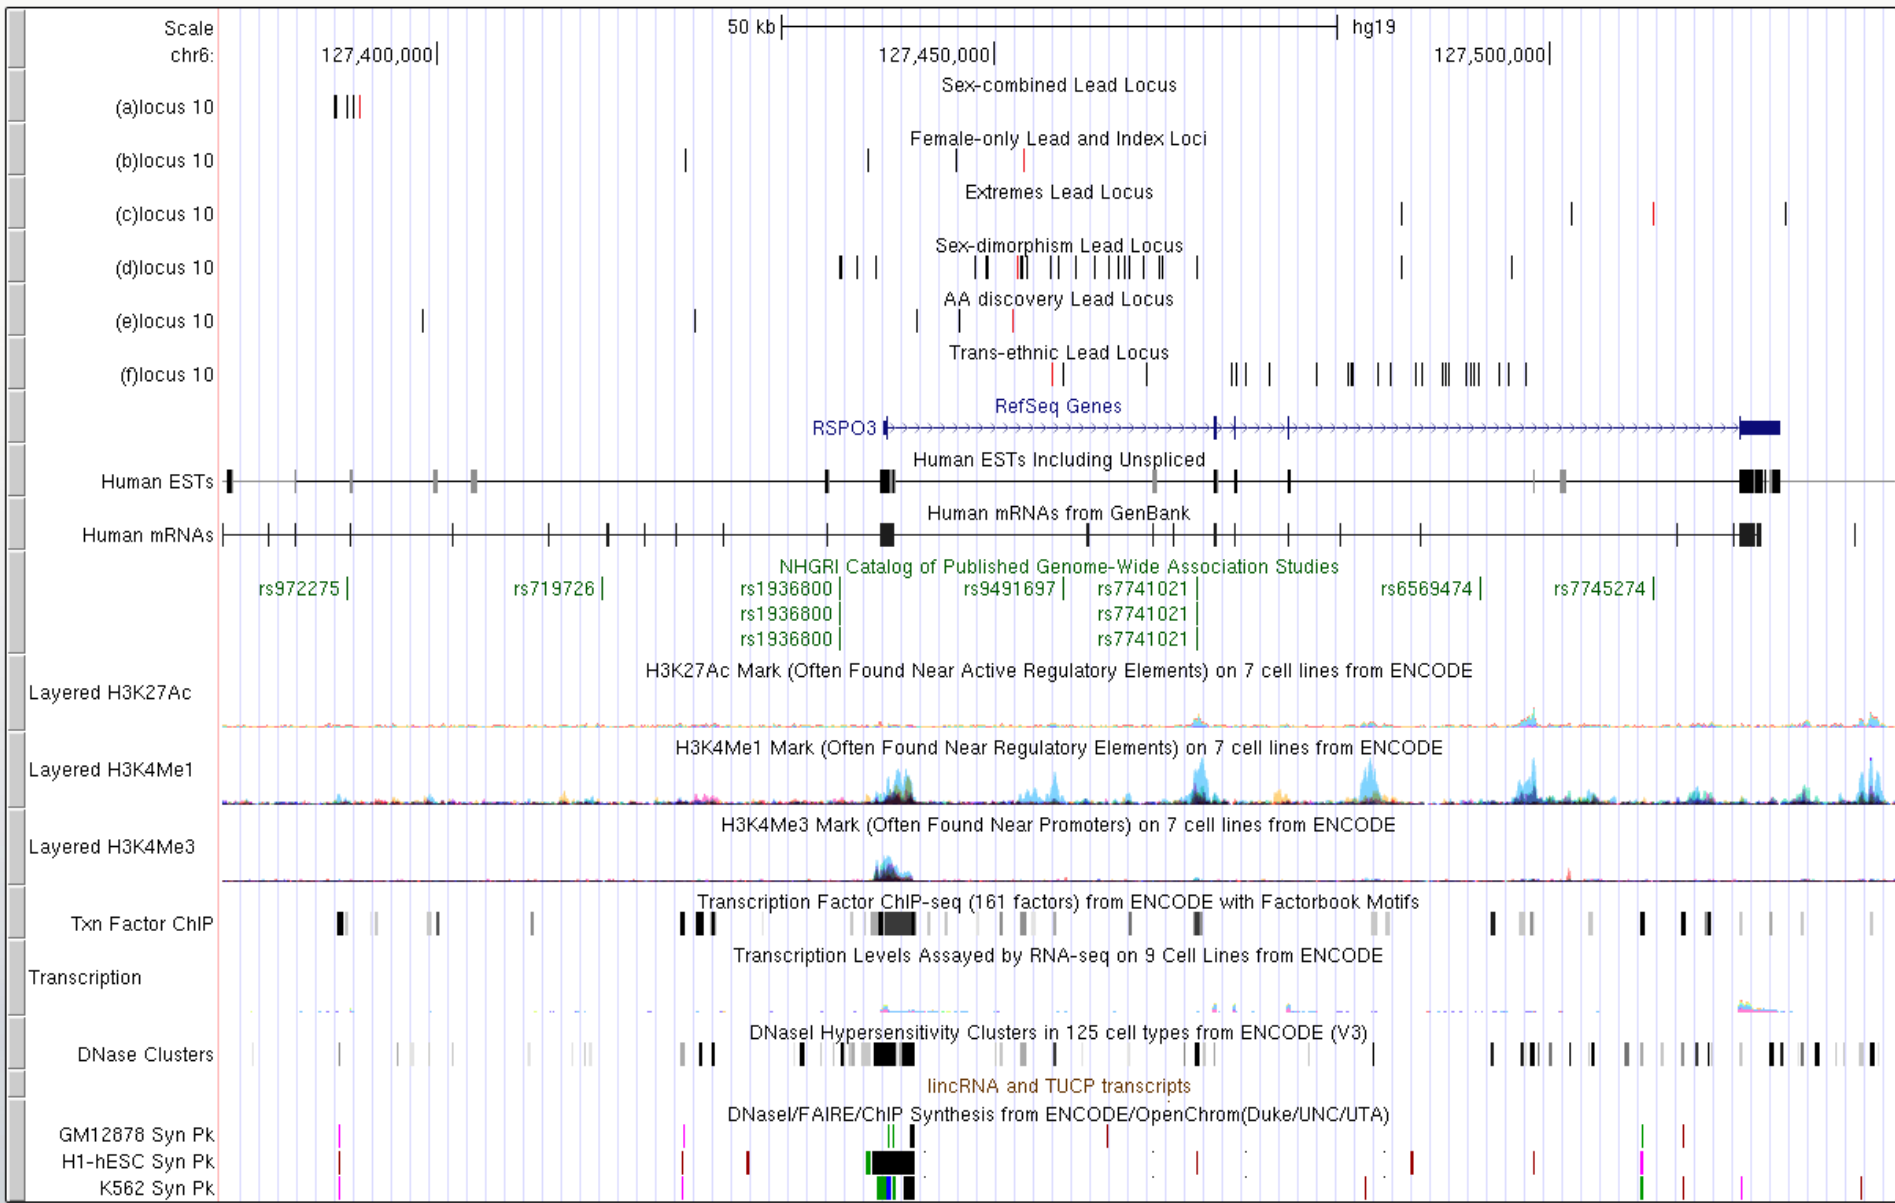

**Supplementary Figure 12.** Visualization of the *RSPO3* locus using the UCSC genome browser. Top tracks show lead SNPs from current and previous studies. The lead SNP is shown in a red vertical bar. All SNPs in  $r^2$  of 0.8 or higher with the lead SNP using 1000G YRI is shown in black vertical bars.
